# Supplementary material for: Assessing the Impact of the Farakka Barrage on Hydrological Alteration in the Padma River with Future Insight
Source: MDPI journal article supplement (doi:10.3390/su14095233), 2022-04-26
Supplement: s1 [file s1]

## Supplementary figure

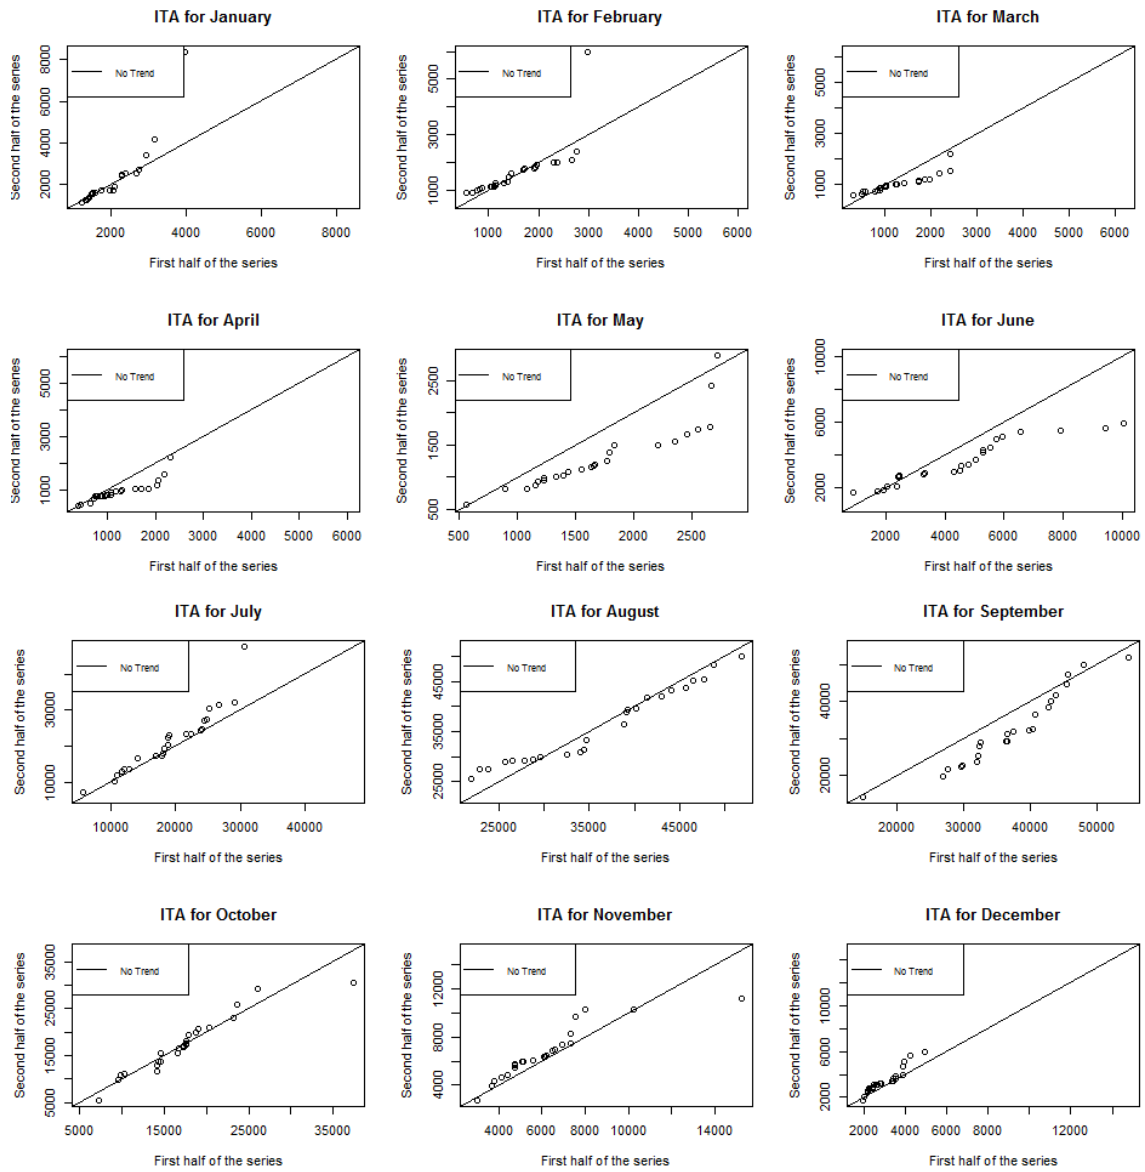

Figure S1 Innovative trend analysis for average discharge (Supplementary section)

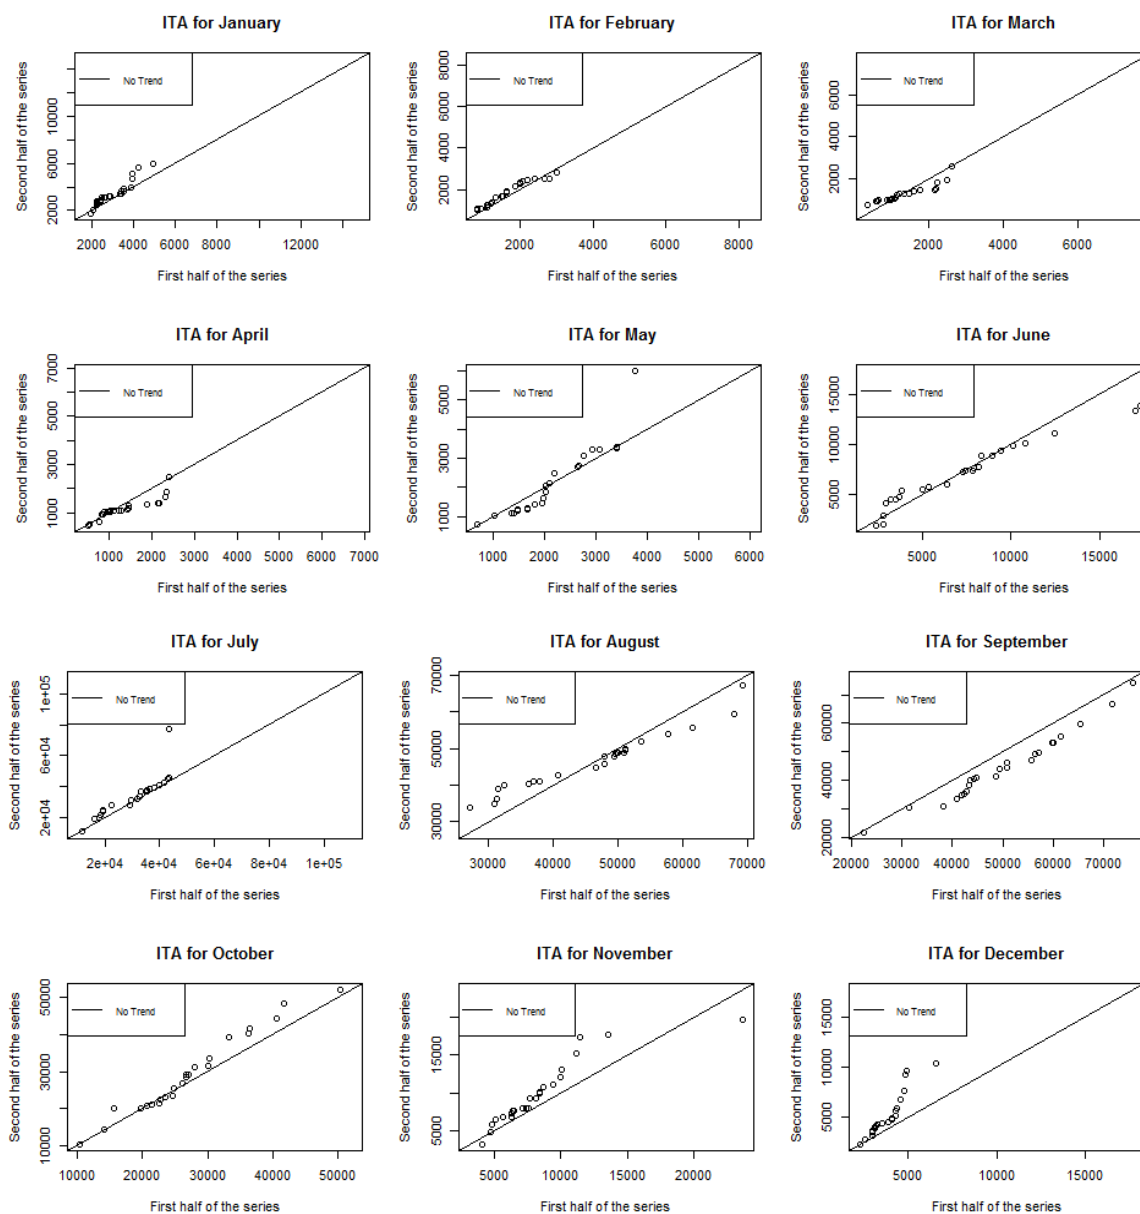

Figure S2 Innovative trend analysis for maximum discharge (supplementary section)

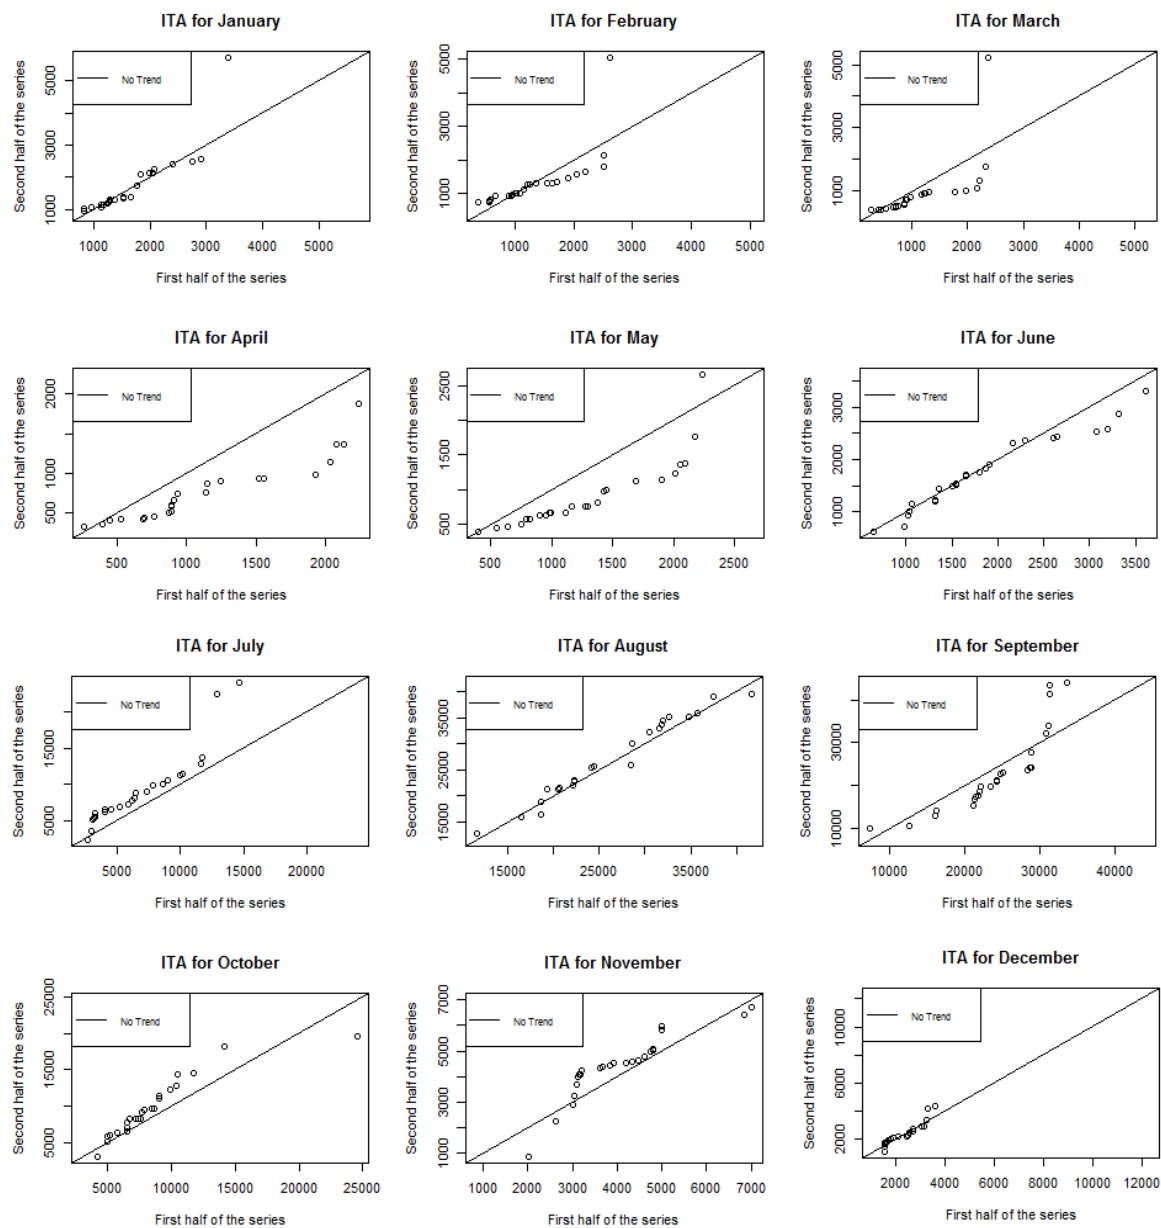

Figure S3 Innovative trend analysis for minimum discharge (supplementary section)

### Supplementary table

Table S1 The optimized parameters of machine learning algorithms by PSO for groundwater potentiality modelling

| Algorithms  | Optimized Parameters                                                                                                                                                                                                                                                                                                     |
|-------------|--------------------------------------------------------------------------------------------------------------------------------------------------------------------------------------------------------------------------------------------------------------------------------------------------------------------------|
| PSO-M5P     | Lag-5, Seed-10, Number of iteration-1000, Learning rate-0.2, Activation function in hidden unit-Sigmoid, Swarm size-20, Iteration-500, mutation type-bit-flip, mutation probability-0.01, inertia weight-0.33, social weight-0.33, individual weight-0.34, report frequency-20, seed-5                                   |
| PSO-REPTree | Lag-5, seed-10, Number of hidden unit-7, activation for hidden unit-Sigmoid, Number of iteration-1000; learning rate-0.2, Swarm size-25, Iteration-100, mutation type-bit-flip, mutation probability-0.01, inertia weight-0.33, social weight-0.33, individual weight-0.34, report frequency-20, seed-1                  |
| PSO-RF      | Maximum depth of tree-8, calculation of out of bag error-TRUE, Number of hidden unit-7, Number of iteration-1500, Lag-5, Number of thread-4, seed-5, Swarm size-35, Iteration-100, mutation type-bit-flip, mutation probability-0.01, inertia weight-0.33, social weight-0.33, individual weight-0.34, report frequency- |

|  |            |
|--|------------|
|  | 20, seed-3 |
|--|------------|

Table S2 Monthly RVA analysis for average, maximum and minimum discharge in this study

| <b>Months</b> | <b>High<br/>Threshold</b> | <b>Low<br/>Threshold</b> | <b>Maximum</b> | <b>Minimum</b> | <b>Average</b> |
|---------------|---------------------------|--------------------------|----------------|----------------|----------------|
| January       | 4185.62                   | 2801.04                  | 2913.38        | 1555.33        | 2087.87        |
| February      | 3186.33                   | 2250.34                  | 1782.26        | 1211.78        | 1453.98        |
| March         | 2644.31                   | 1982.36                  | 1378.47        | 899.39         | 1123.59        |
| April         | 2604.05                   | 2136.29                  | 1274.29        | 786.2          | 1068.16        |
| May           | 3261.78                   | 2376.56                  | 2013.93        | 973.51         | 1366.59        |
| June          | 13877.74                  | 6517.92                  | 6676.44        | 1719.75        | 3640.83        |
| July          | 44057.05                  | 21409.61                 | 33413.3        | 7731.50        | 19756.47       |
| August        | 51995.65                  | 31223.02                 | 46857.53       | 26212.11       | 36204.1        |
| September     | 51860.73                  | 41491.27                 | 47119.43       | 23316.54       | 34994.59       |
| October       | 30802.19                  | 20846.14                 | 28138.99       | 8975.89        | 17032.81       |
| November      | 11767.06                  | 7261.27                  | 9013.42        | 4131.22        | 6257.93        |
| December      | 5985.349                  | 3632.98                  | 4821.37        | 2401.23        | 3425.34        |
